# Supplementary material
Source: PubMed Central journal article supplement (PMC5172462)

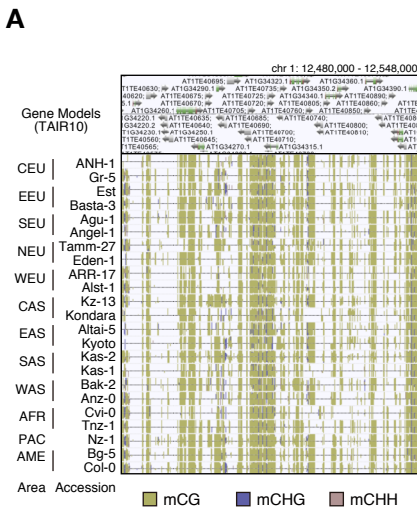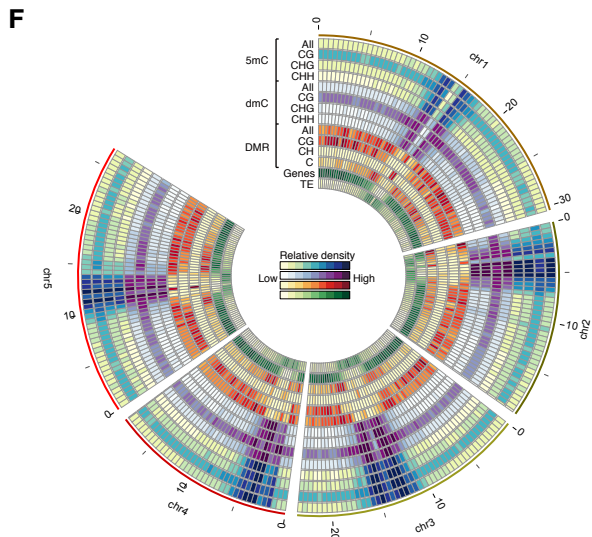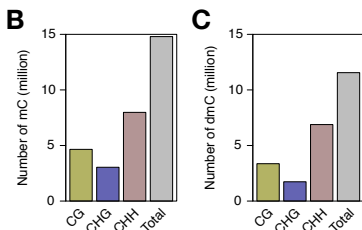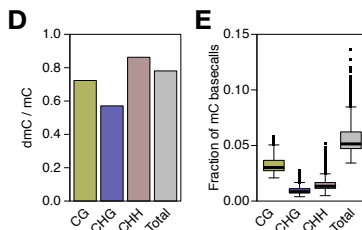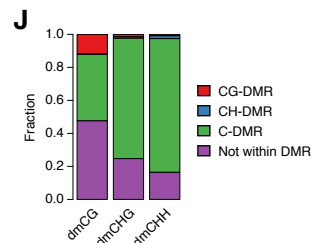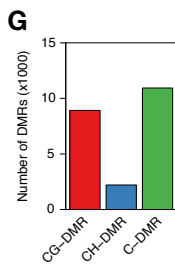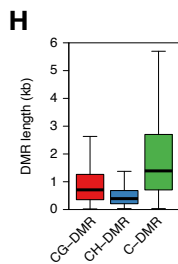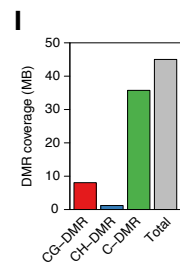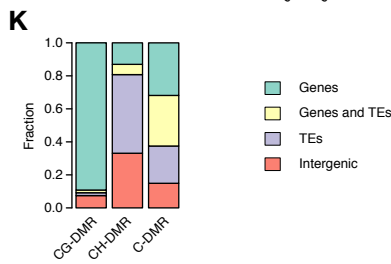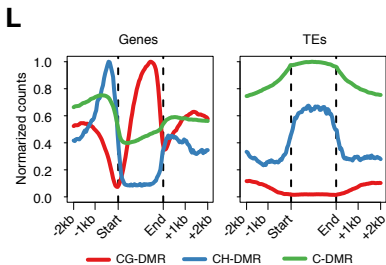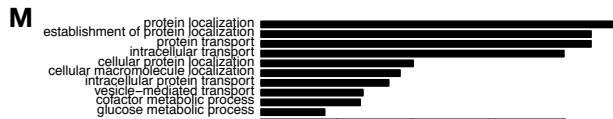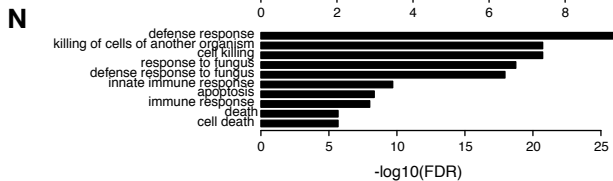

Supplement: NIHMS836043-supplement-FigS1_pdf.pdf [file NIHMS836043-supplement-FigS1_pdf.pdf]

# 1% MAF (IBS)

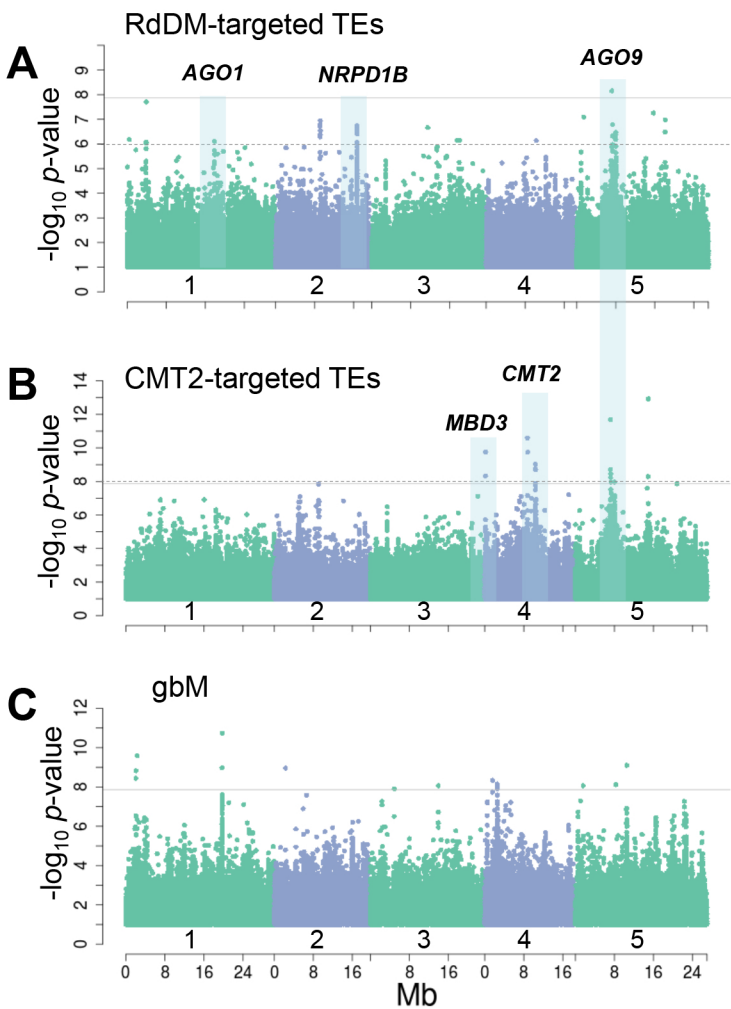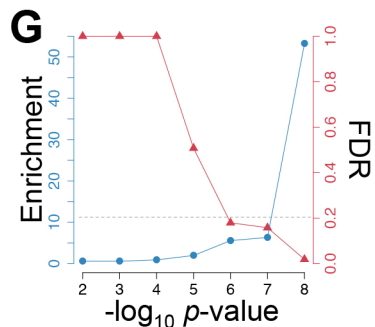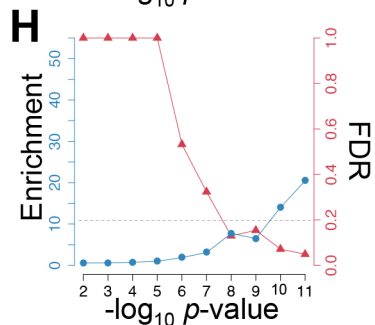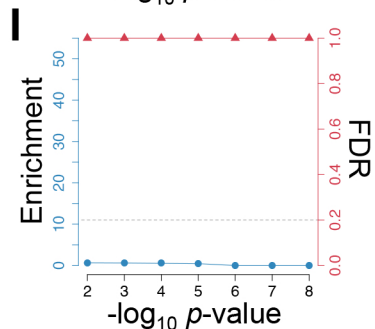

# 5% MAF (IBD)

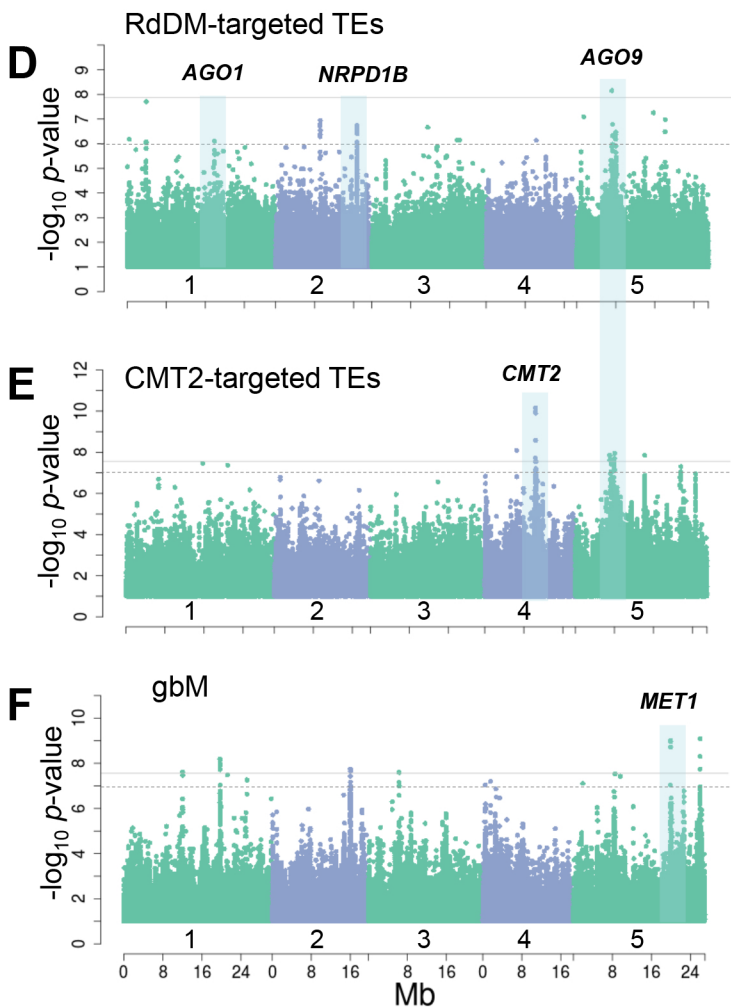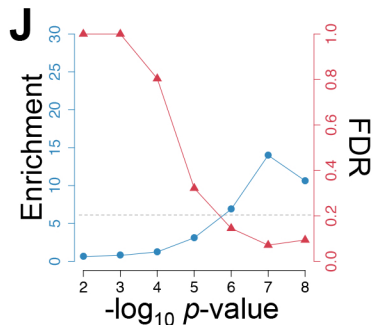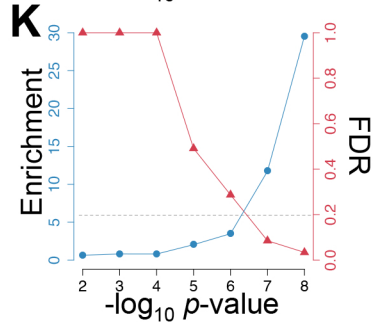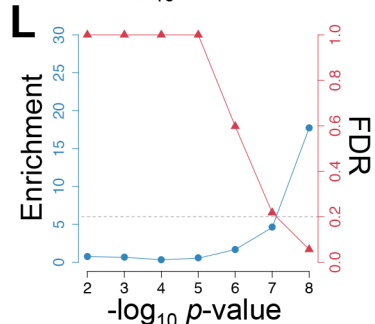

Supplement: NIHMS836043-supplement-FigS2_pdf.pdf [file NIHMS836043-supplement-FigS2_pdf.pdf]

**A** MAF>5% (IBS)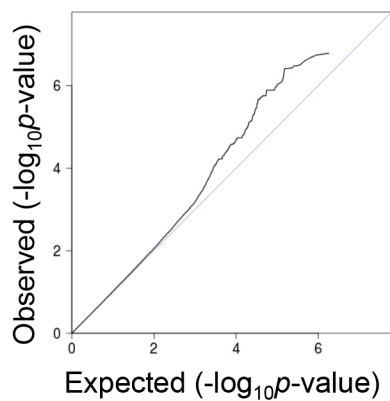**B**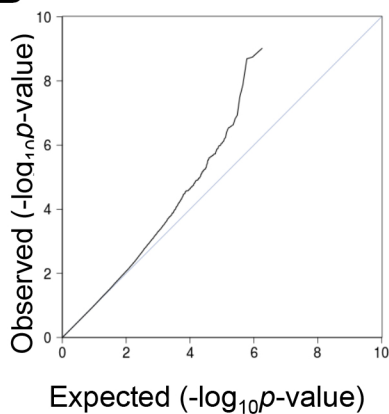**C**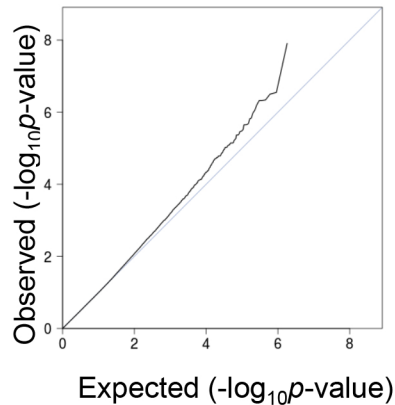**D** MAF>1% (IBS)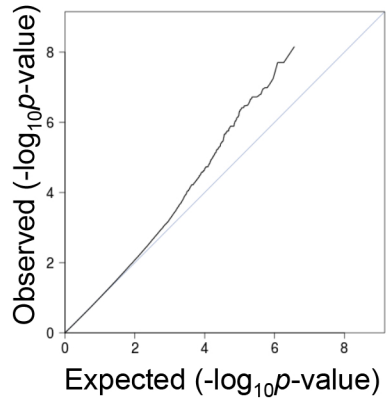**E**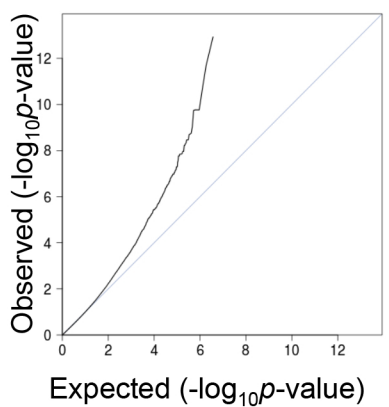**F**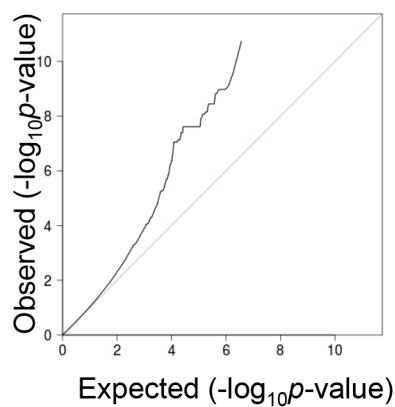**G** MAF>5% (IBD)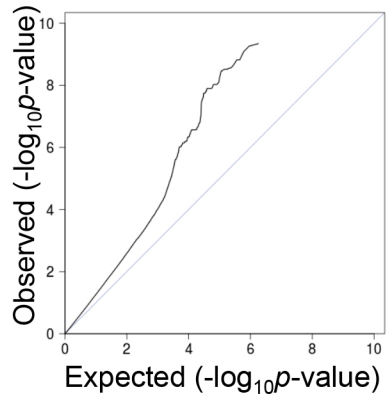**H**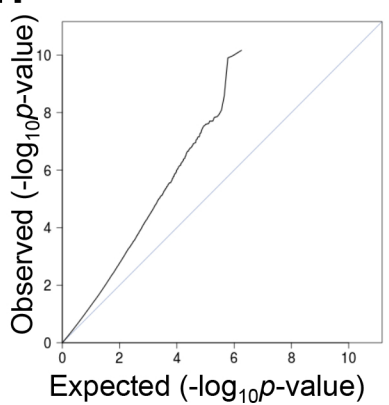**I**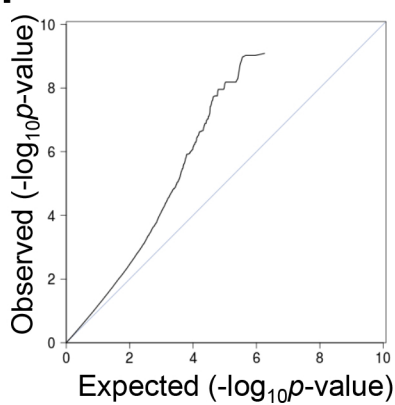

RdDM-targeted TEs

CMT2-targeted TEs

gbM

Supplement: NIHMS836043-supplement-FigS3_pdf.pdf [file NIHMS836043-supplement-FigS3_pdf.pdf]

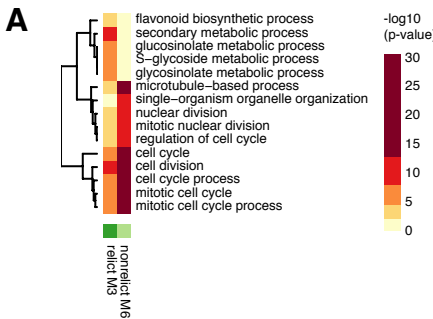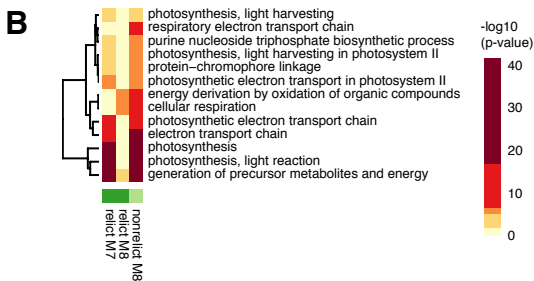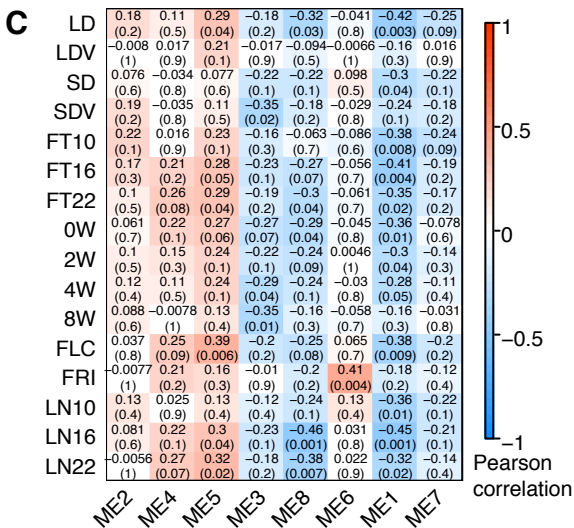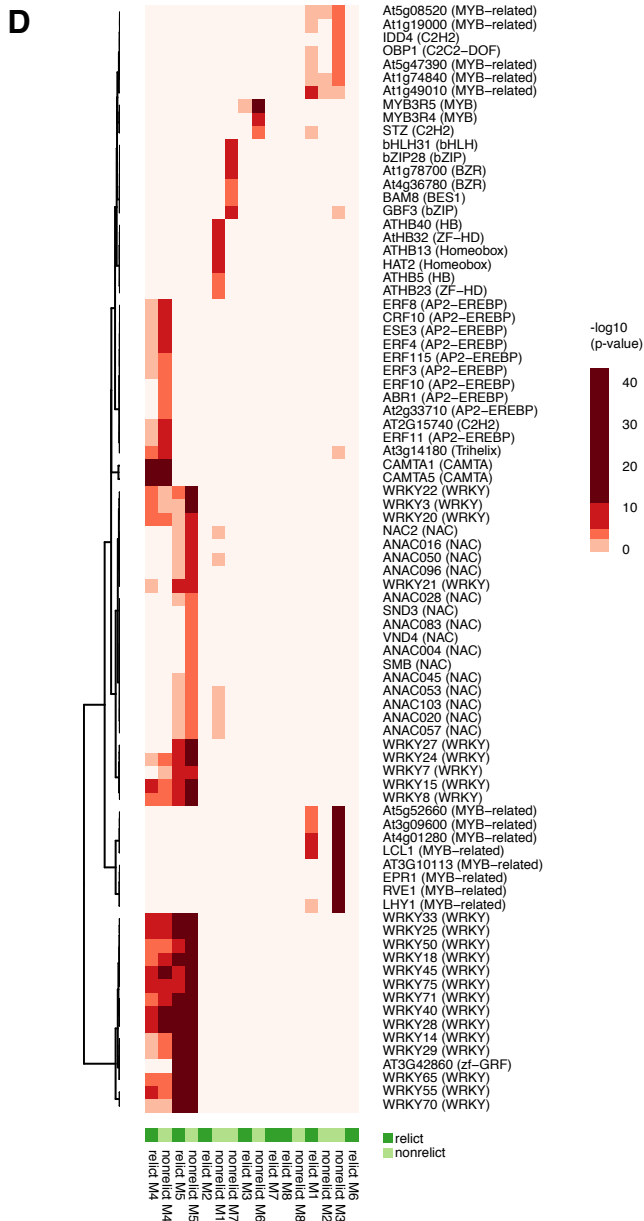

Supplement: NIHMS836043-supplement-FigS4_pdf.pdf [file NIHMS836043-supplement-FigS4_pdf.pdf]

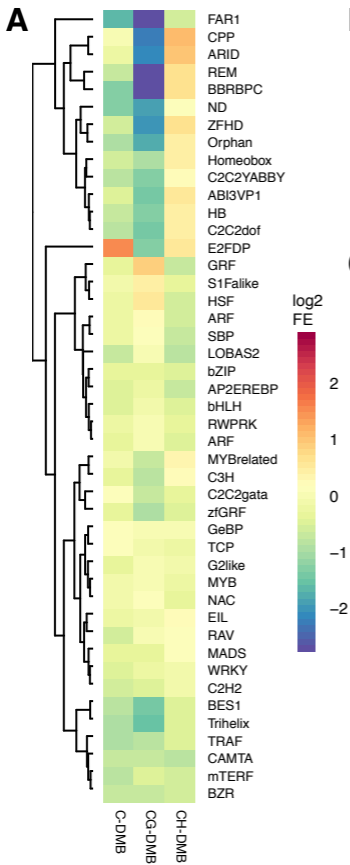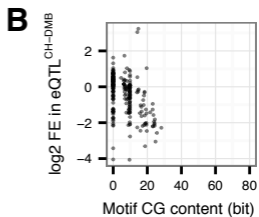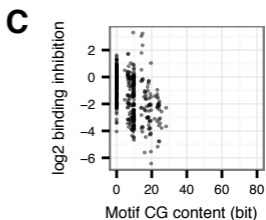

Supplement: NIHMS836043-supplement-FigS5_pdf.pdf [file NIHMS836043-supplement-FigS5_pdf.pdf]

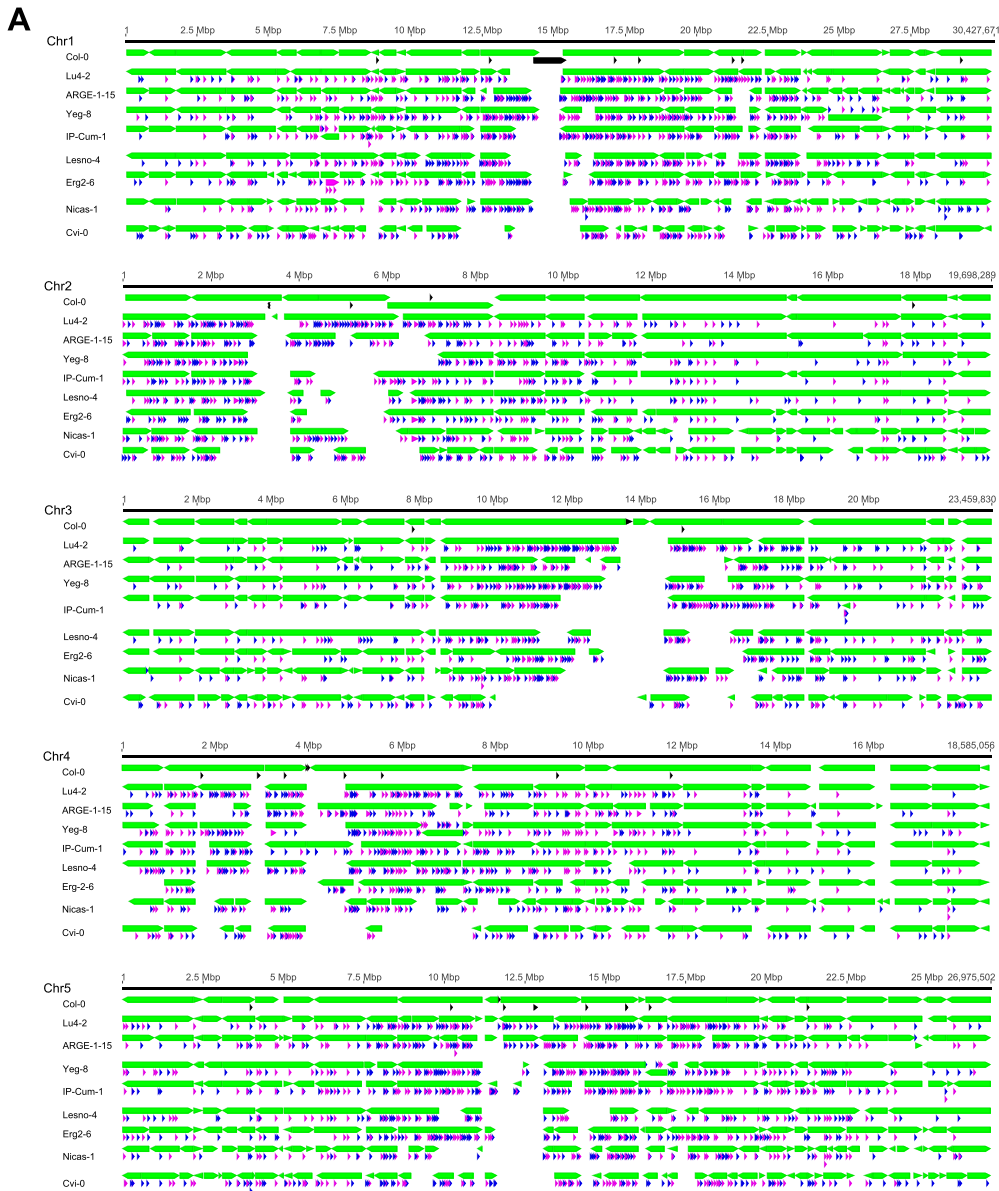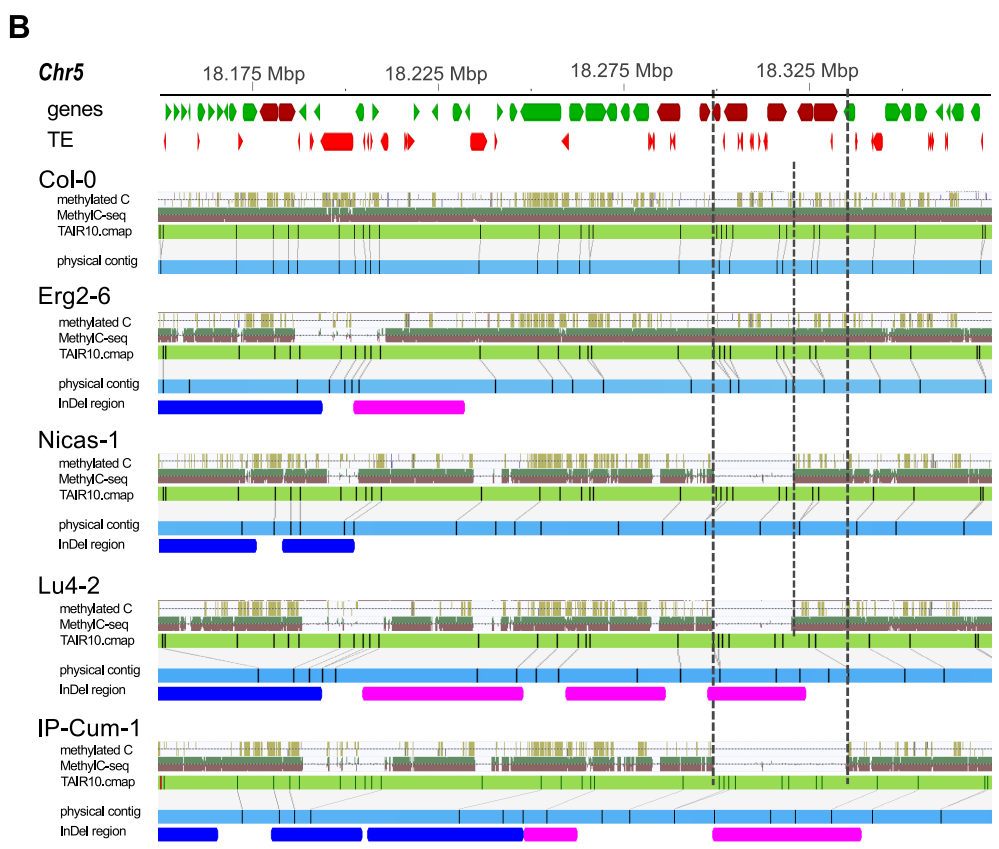

Supplement: NIHMS836043-supplement-FigS6_pdf.pdf [file NIHMS836043-supplement-FigS6_pdf.pdf]
